# Supplementary material
Source: publisher figshare collection journal article supplement (https://karger.figshare.com/ndownloader/files/28365876)
Supplement: Supplementary file 1 [file 28365876]

Table S3: Laboratory parameters, univariate analysis.

| **Parameter** | **n (%)** | **Median survival**  **(months)** | **95%-CI** | **p-value** |
| --- | --- | --- | --- | --- |
| ***AFP (ng/ml)**  1. Quartile: <7.75  2. Quartile: 7.75-41.15  3. Quartile: 41.15-493  4. Quartile: >493 | 72  18 (25)  18 (25)  18 (25)  18 (25) | 27.8  19.2  11.4  8.4 | 13.0-38.9  5.6-50.5  8.9-21.9  4.4-13.1 | 0.03 |
| ***Albumin (g/dl)**  1. Quartile: <3.5  2. Quartile: 3.50-3.9  3. Quartile: 3.90-4.4  4. Quartile: >4.4 | 72  18 (25)  16 (22.2)  20 (27.8)  18 (25) | 6.9  11.4  12.5  26.5 | 4.4-9.9  9.9-17.3  6.5-52.3  14.6-36.4 | 0.007 |
| ***AP (U/l)**  1. Quartile: <116  2. Quartile: 116-159  3. Quartile: 159-246.5  4. Quartile: >246.5 | 72  18 (25)  18 (25)  18 (25)  18 (25) | 36.4  12.4  9.9  8.0 | 27.8-52.3  7.6-17.3  5.6- -  4.4-11.4 | 0.0002 |
| **Bilirubin (mg/dl)**  1. Quartile: <0.7  2. Quartile: 0.7-0.88  3. Quartile: 0.88-1.25  4. Quartile: >1.25 | 72  17 (23.6)  19 (26.4)  18 (25)  18 (25) | 13.2  18.9  11.2  7.6 | 8.3-29.8  8.4-25.5  5.2- -  4.7-27.8 | 0.49 |
| **CRP (mg/dl)**  1. Quartile: <0.45  2. Quartile: 0.45-1.0  3. Quartile: 1.0-1.8  4. Quartile: >1.8 | 72  18 (25)  17 (23.6)  19 (26.4)  18 (25) | 27.8  12.5  10.9  8.3 | 11.2-36.4  6.5-25.5  7.6-26.5  4.1-17.3 | 0.06 |
| **GGT (U/l)**  1. Quartile: <130  2. Quartile: 130-194  3. Quartile: 194-308.5  4. Quartile: >308.5 | 72  18 (25)  18 (25)  18 (25)  18 (25) | 17.3  27.8  12.7  9.1 | 7.7-34.2  6.3-38.9  8.3-21.9  5.2-11.4 | 0.07 |
| **GOT (U/l)**  1. Quartile: <47  2. Quartile: 47.-68  3. Quartile: 68-89  4. Quartile: >89 | 72  18 (25)  19 (26.4)  18 (25)  17 (23.6) | 29.8  11.2  14.6  8.0 | 13.2-36.4  7.6-27.8  8.3-22.7  3.9-13.1 | 0.04 |
| **GPT (U/l)**  1. Quartile: <33.5  2. Quartile: 33.5-44.5  3. Quartile: 44.5-72  4. Quartile: >72 | 72  18 (25)  18 (25)  19 (26.4)  17 (23.6) | 29.8  19.5  10.5  11.4 | 6.9-36.4  7.6-38.9  5.5-17.3  7.7-18.9 | 0.27 |
| **Hemoglobin (g/dl)**  1. Quartile: <11.6  2. Quartile: 11.6-13  3. Quartile: 13-14.3  4. Quartile: >14.3 | 72  17 (23.6)  18 (25)  21 (29.2)  16 (22.2) | 10.5  13.1  12.7  12.5 | 4.7-22.7  8.0-27.8  8.3-30.2  6.3-34.2 | 0.92 |
| **INR**  1. Quartile: <1.0  2. Quartile: 1.0-1.1  3. Quartile: 1.1-1.2  4. Quartile: >1.2 | 72  22 (30.6)  24 (33.3)  16 (22.2)  10 (13.9) | 13.2  17.3  9.9  7.6 | 11.2-25.5  9.9-34.2  5.6-18.9  1.0- - | 0.53 |
| **Creatinin (mg/dl)**  1. Quartile: <0.9  2. Quartile: 0.9-1.0  3. Quartile: 1.0-1.2  4. Quartile: >1.2 | 72  15 (20.8)  26 (36.1)  16 (22.2)  15 (20.8) | 10.5  13.0  13.2  14.6 | 4.4-17.3  8.4-27.8  8.4-36.4  3.9-30.2 | 0.37 |
| **LDH (U/l)**  1. Quartile: <213.5  2. Quartile: 213.5-244  3. Quartile: 244-278.5  4. Quartile:>278.5 | 72  18 (25)  17 (23.6)  19 (26.4)  18 (25) | 27.8  9.9  10.9  13.0 | 8.4-36.4  4.7-21.9  8.0-34.2  6.5-22.7 | 0.28 |
| **Platelets (T/µl)**  1. Quartile: <119  2. Quartile: 119-156  3. Quartile: 156-224  4. Quartile: >224 | 72  18 (25)  18 (25)  18 (25)  18 (25) | 10.5  22.2  13.2  12.7 | 7.6-50.5  9.9-30.2  5.6-22.7  5.5-29.8 | 0.89 |

*components of the M-SIRT-score
